# Supplementary material for: NMR detection of chirality and enantiopurity of amines by using benzene tricarboxamide-based hydrogelators as chiral solvating agents
Source: Royal Society of Chemistry journal article supplement (doi:10.1039/c6nj01543c), 2016-01-01
Supplement: c6nj01543c1.pdf [file c6nj01543c1.pdf]

## Electronic Supplementary Information (ESI)

### **NMR Detection of chirality and enantiopurity for amines by using benzene tricarboxamide-based hydrogelators as chiral solvating agents**

Sung Ho Jung,<sup>a,c</sup> Ka Young Kim,<sup>a,c</sup> Ahreum Ahn,<sup>a</sup> Shim Sung Lee,<sup>a</sup> Myong Yong Choi,<sup>a</sup>  
Justyn Jaworski<sup>\*,b</sup> and Jong Hwa Jung<sup>\*,a</sup>

<sup>a</sup> Department of Chemistry and Research Institute of Natural Science, Gyeongsang National University, Jinju 660-701 (Korea); E-mail: [jonghwa@gnu.ac.kr](mailto:jonghwa@gnu.ac.kr)

<sup>b</sup> Department of Chemical Engineering and Institute of Nanoscience and Technology, Hanyang University, Seoul (Korea); E-mail: [justynj@hanyang.ac.kr](mailto:justynj@hanyang.ac.kr)

<sup>c</sup> These authors contributed equally in this work.

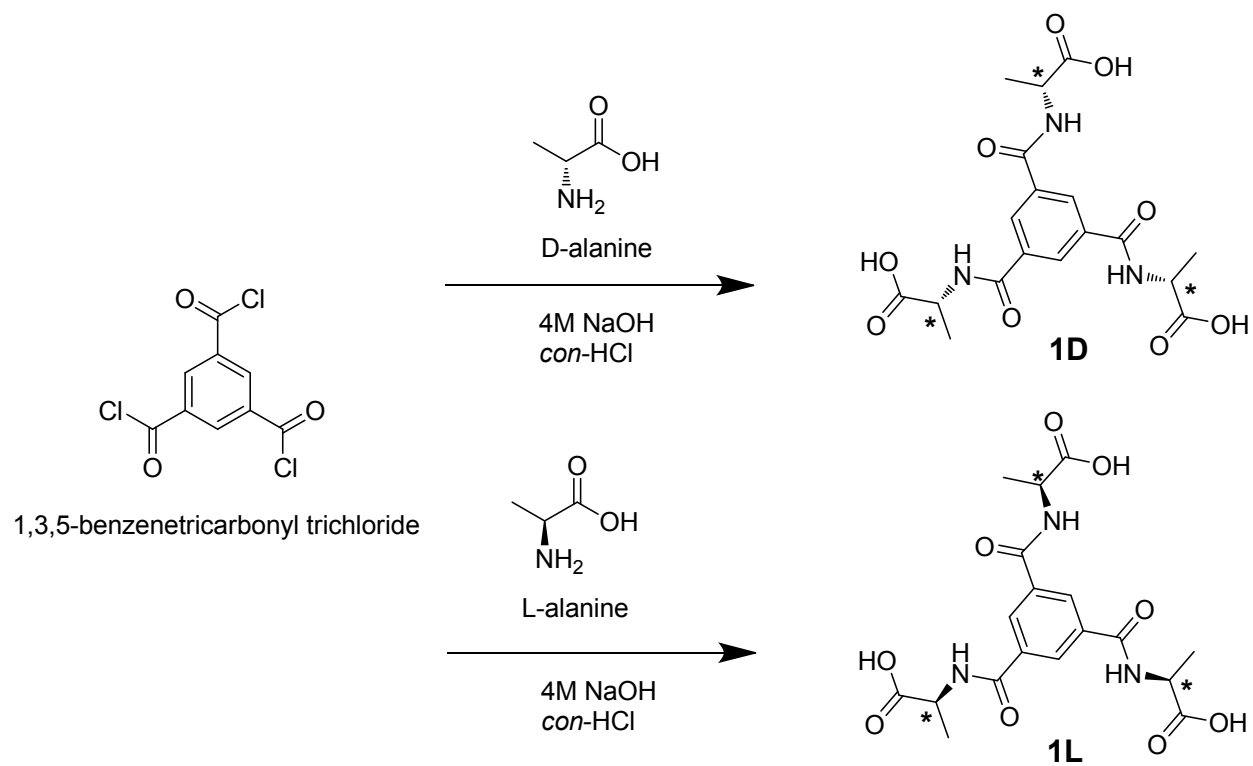

**Scheme S1.** Synthesis of **1D** and **1L**.

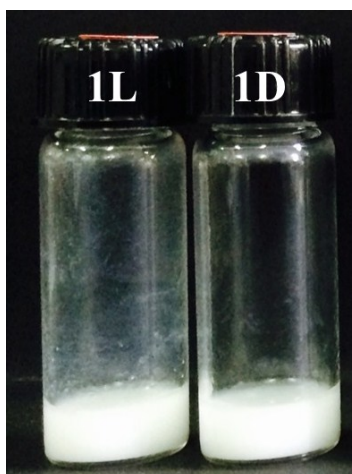

**Fig. S1** Photograph of gelation test of gelator **1L** (left) and **1D** (right) in water (1.0 wt%).

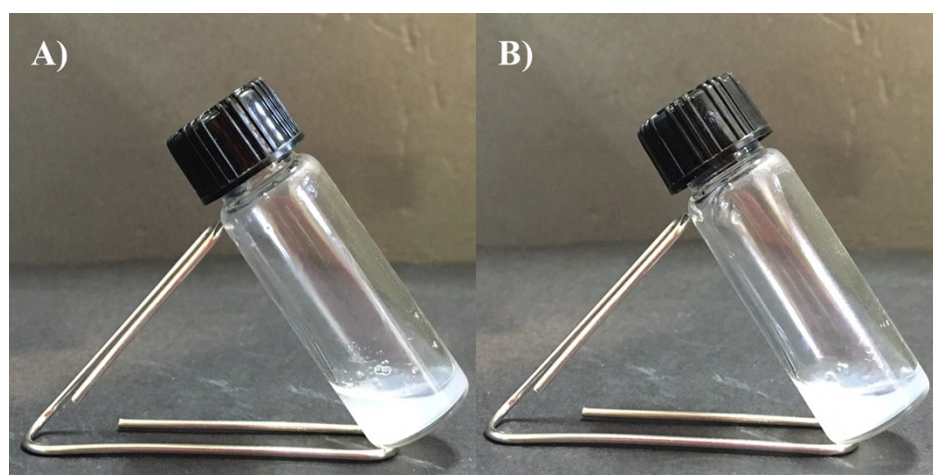

**Fig. S2** Photograph of gelation test of gelator **1L+4R** (left) and **1D+4S** (right) in  $D_2O$  and  $DMSO-d_6$  mixtures (1.0 wt%).

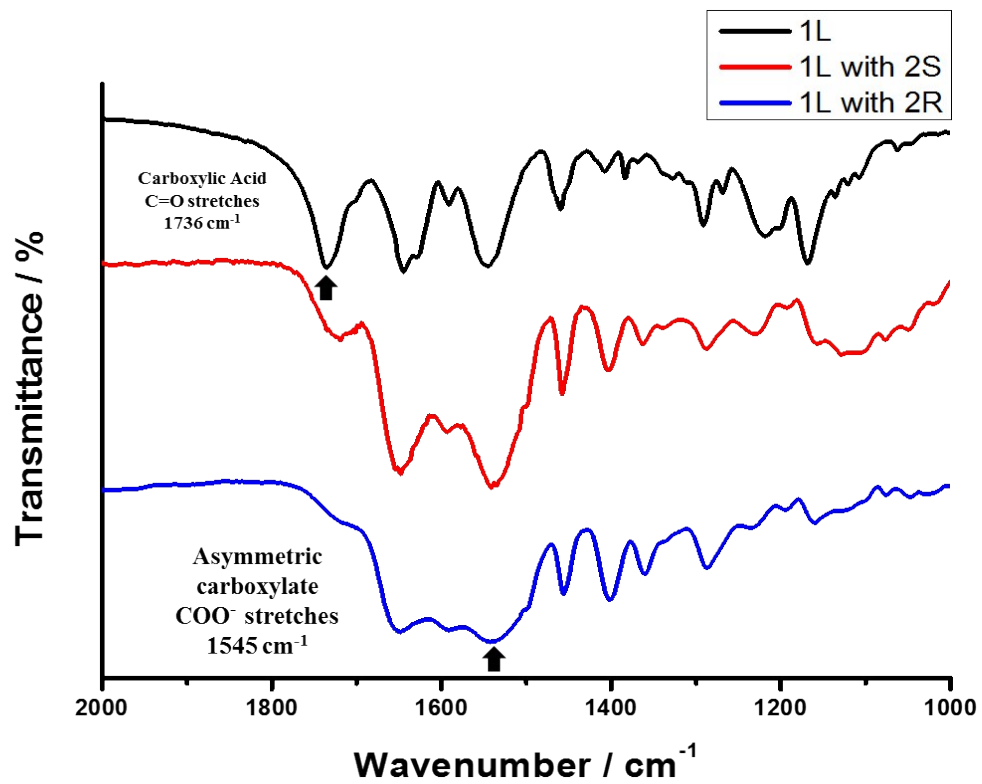

Fig. S3 IR spectra of 1L, 1L with 2S and hydrogel of 1L with 2R.

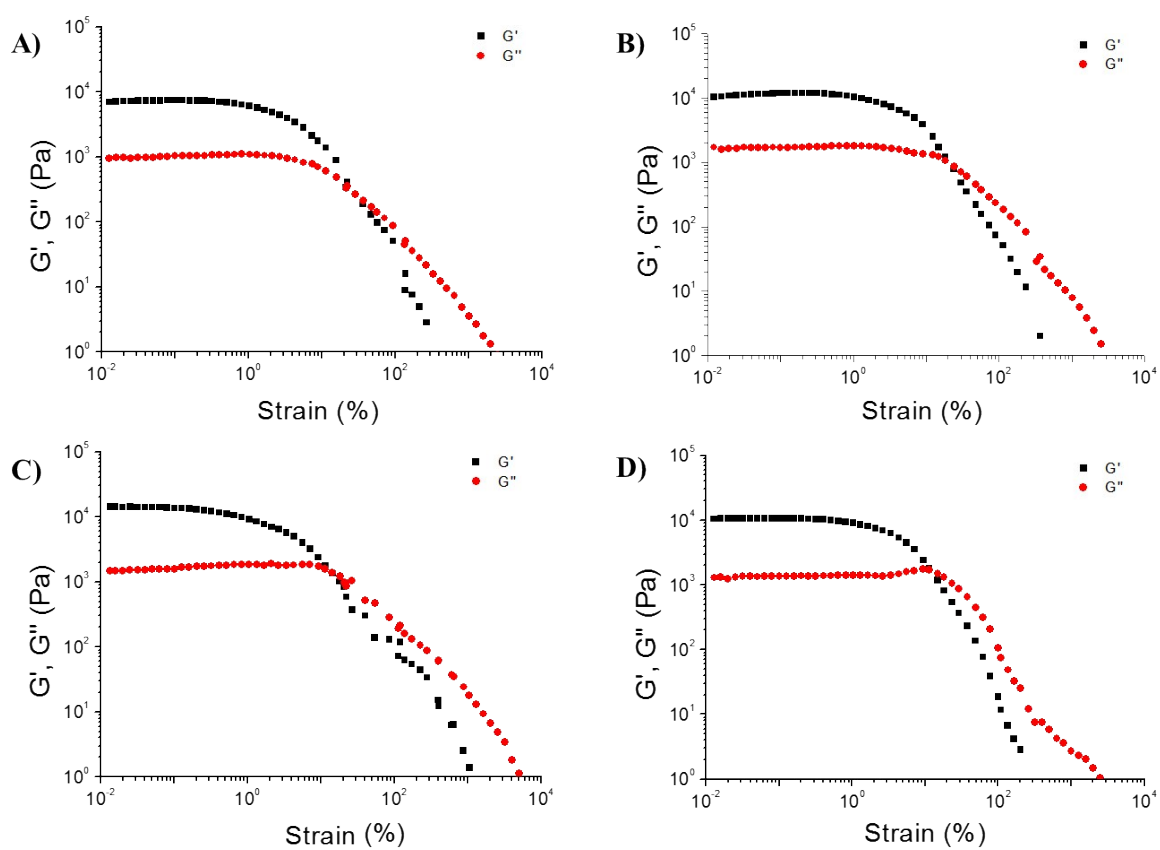

**Fig. S4** Measurements of strain sweep tests at a strain of 0.1 to 1.0% for (A) **1L+2R** (1.5 equiv.) hydrogel, (B) **1D+2S** (1.5 equiv.) hydrogel, (C) **1L+2R** (3.0 equiv.) hydrogel and (D) **1D+2S** (3.0 equiv.) hydrogel.

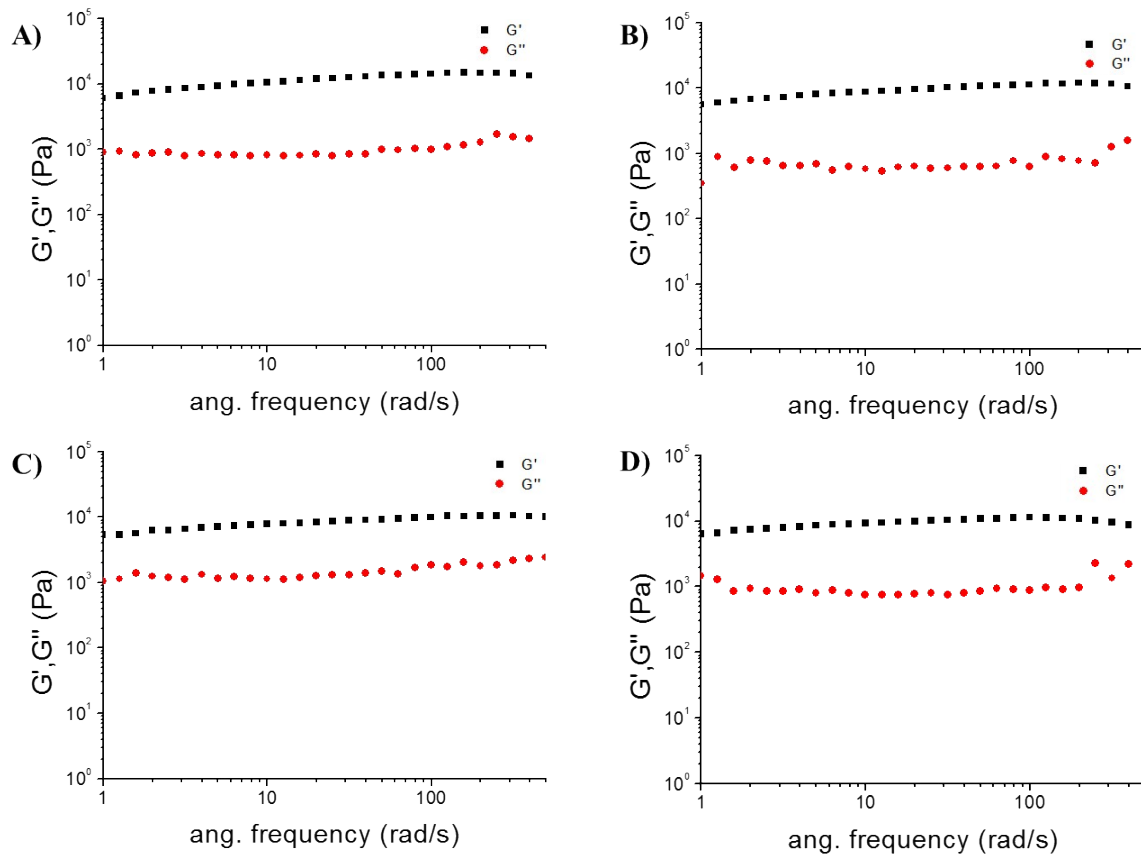

**Fig. S5** Frequency sweep tests (from 0.1 to 100 rad/s) for (A) **1L+2R** (1.5 equiv.) hydrogel, (B) **1D+2S** (1.5 equiv.) hydrogel, (C) **1L+2R** (3.0 equiv.) hydrogel and (D) **1D+2S** (3.0 equiv.) hydrogel.

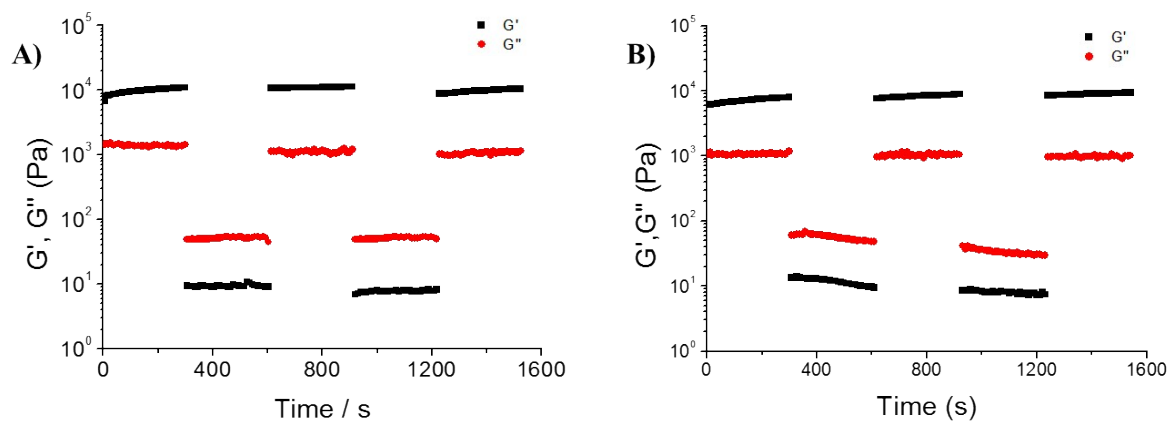

**Fig. S6** Continuous step strain measurements for (A) **1L+2R** (1.5 equiv.) hydrogel and (B) **1D+2S** (1.5 equiv.) hydrogel.

A)

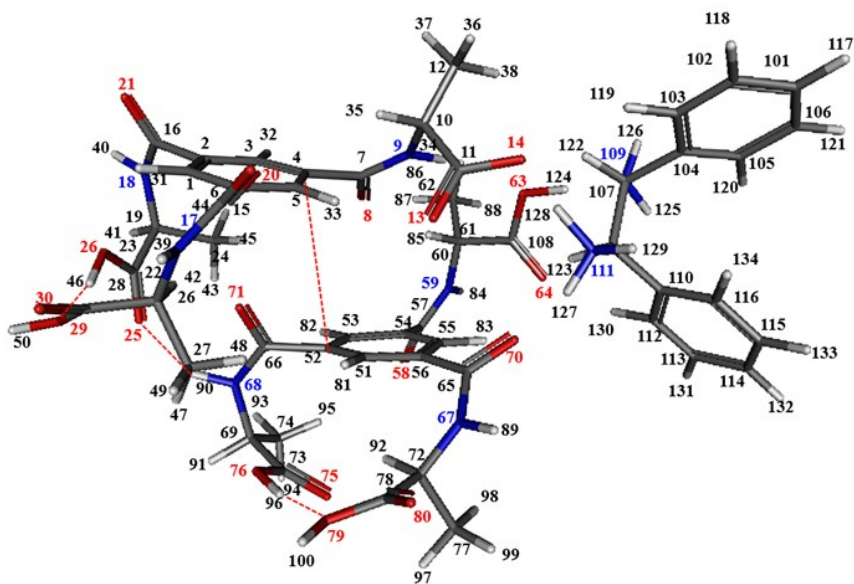

B)

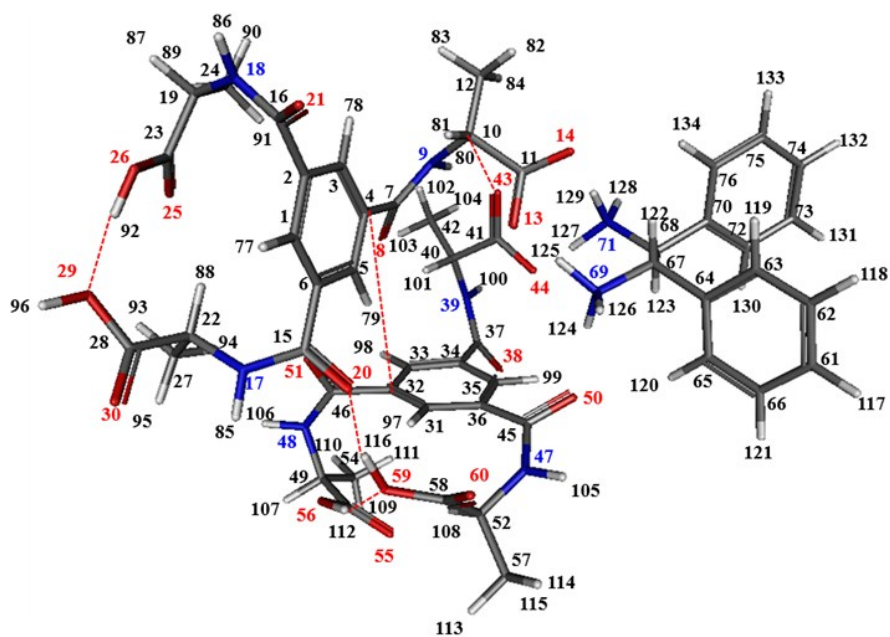

**Fig. S7** Molecular structures and atom numbering of (A) 1L+2R and (B) 1L+2S as predicted using DFT calculations.



**Table S1.** Calculated relative energy (kcal/mol), bond lengths (Å) and bond angles (°) of **1L+2R** and **1L+2S** based on optimization at the B3LYP/6-31+G(d) level.

| Relative energy<br>(kcal/mol) | 1L-2R  | 1L-2S  |
|-------------------------------|--------|--------|
|                               |        | 10.09  |
| Bond length (Å)               | 1L-2R  | 1L-2S  |
| H124-N109                     | 1.53   |        |
| O14-H128                      | 1.18   |        |
| O70-H127                      | 1.8    |        |
| H96-O79                       | 1.8    |        |
| O29-H46                       | 1.76   |        |
| O25-H90                       | 1.96   |        |
| C52-C4                        | 4.27   |        |
| O70-H123                      | 2.61   |        |
| O50-H124                      |        | 1.81   |
| O14-H129                      |        | 1.68   |
| O20-H116                      |        | 1.57   |
| O43-H80                       |        | 1.91   |
| O59-H112                      |        | 1.71   |
| O29-H92                       |        | 1.78   |
| C32-C4                        |        | 5.12   |
| O14-H123                      |        | 4.45   |
| Bond angles (°)               | 1L-2R  | 1L-2S  |
| O14-H128-N111                 | 167.69 |        |
| O70-H127-N111                 | 146.39 |        |
| H124-N109-H126                | 107.78 |        |
| H46-O29-H50                   | 116.08 |        |
| O25-H90-N68                   | 148.92 |        |
| H96-O79-H100                  | 118.21 |        |
| O14-H129-N71                  |        | 173.33 |
| O50-H124-N69                  |        | 145.41 |
| H92-O29-H96                   |        | 117.51 |
| O20-H116-O59                  |        | 154.75 |
| O43-C10-H81                   |        | 152.8  |
| O59-H112-O56                  |        | 153.72 |

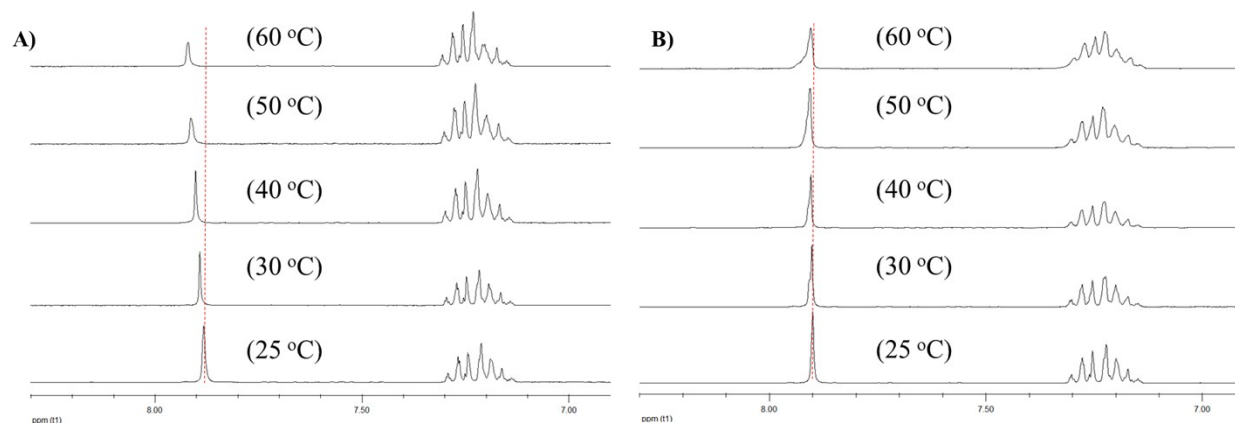

**Fig. S8** Variable temperature (VT)  $^1\text{H}$  NMR spectra of (A) **1L** with **2R** and (B) **1L** with **2S** as temperature increases in  $\text{D}_2\text{O}$  and  $\text{DMSO-}d_6$  mixtures. The left singlet correspond to the aromatic protons of gelator **1L** which experience shielding upon aggregation at lower temperatures, while the complex multiplet on the right corresponds to the aromatic protons of **2R** (for sub-figure A) or **2S** (for sub-figure B).

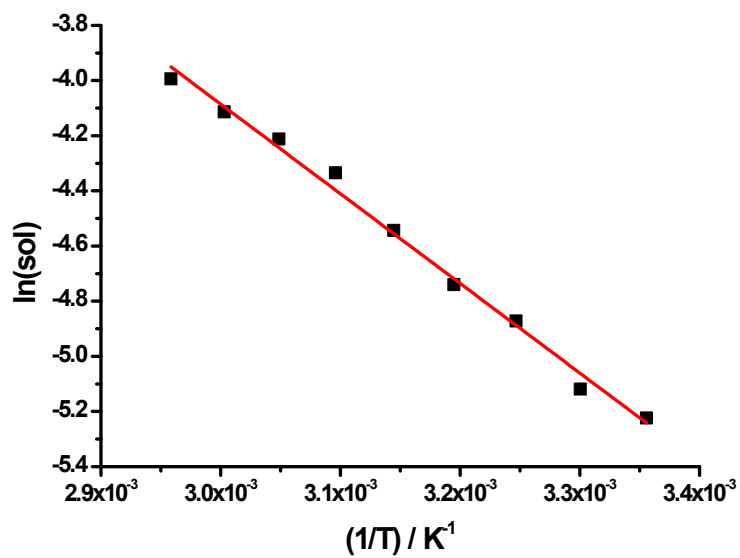

**Fig. S9** Van't Hoff plots of hydrogel (**1L**+**2R**).

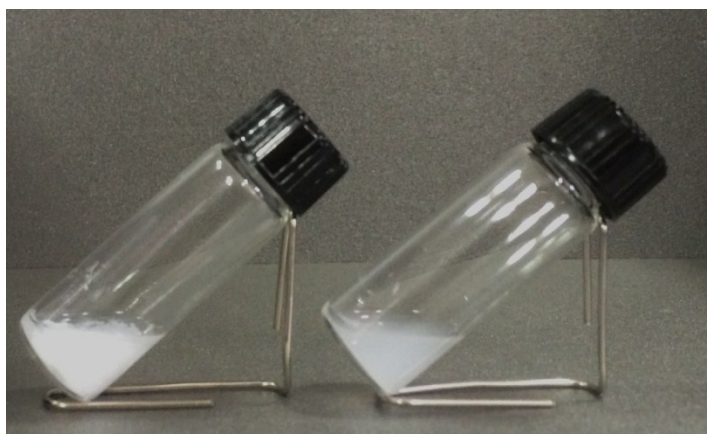

**Fig. S10** Photograph of gelation test of (left) gelator **1L** and (right) **1L** with racemic mixture of **2R** (0.75 equiv.) and **2S** (0.75 equiv.) in water (0.1 wt%).

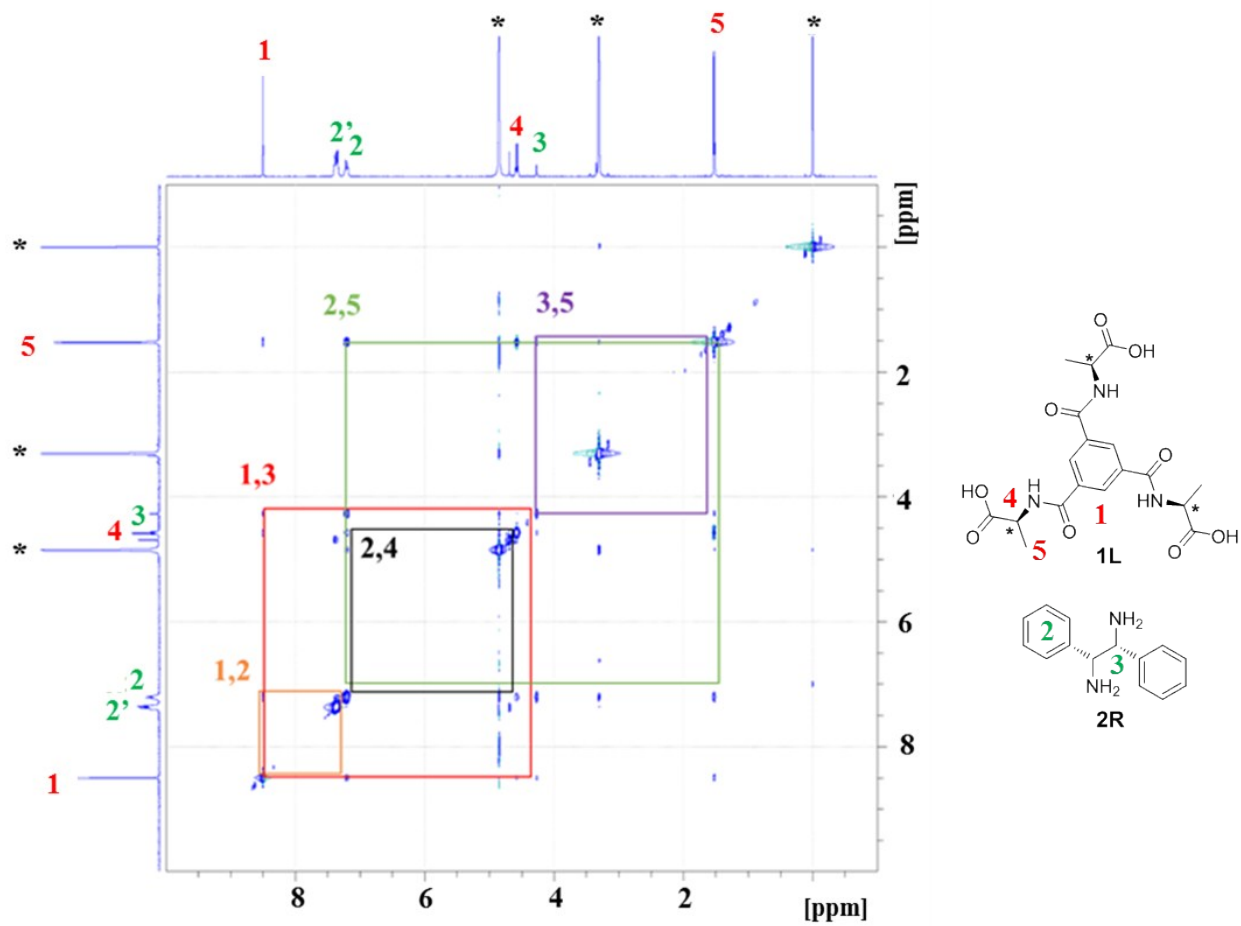

**Fig. S11** 2D NOESY spectrum (500 MHz, CD<sub>3</sub>OD, 323 K) of **1L** (2.0 mM) with **2R** (1.5 equiv.).

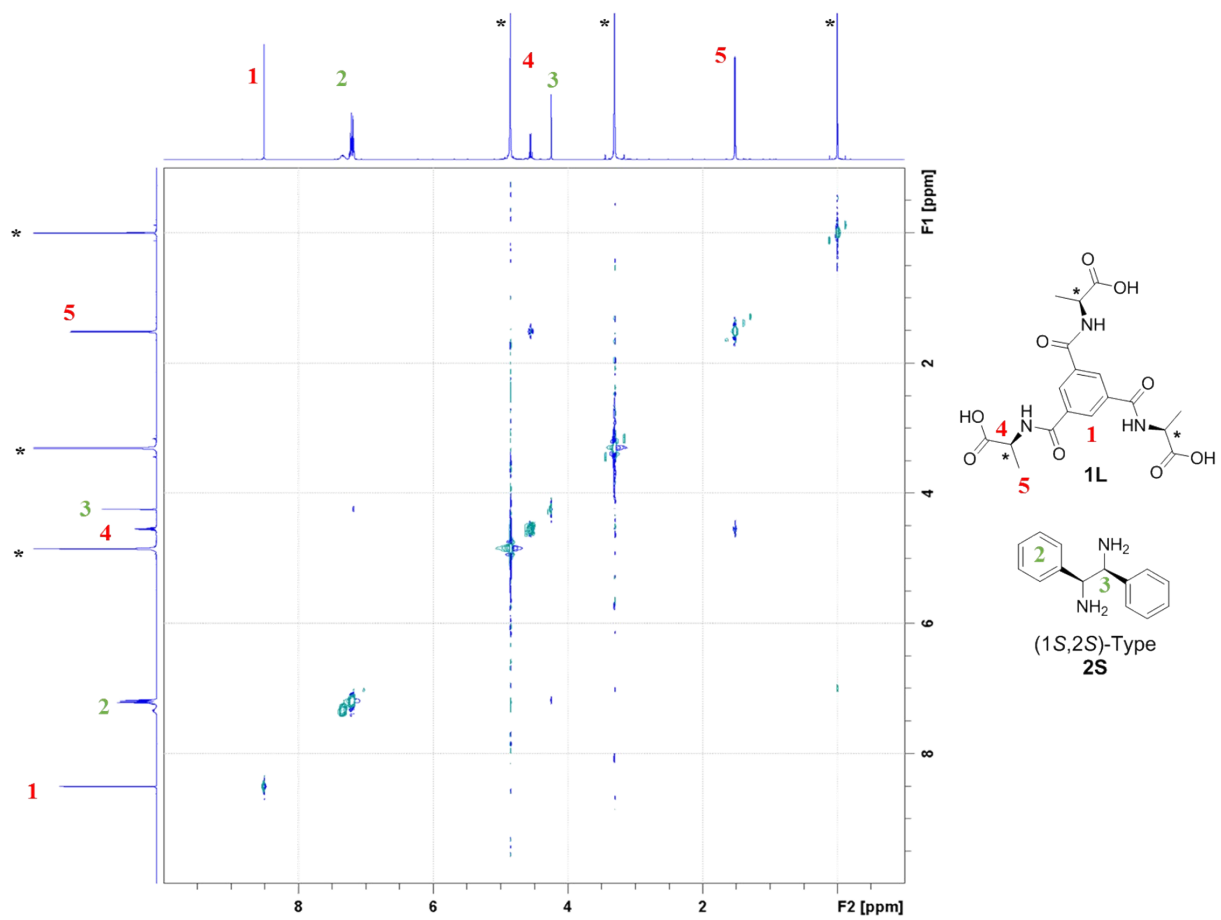

**Fig. S12** 2D NOESY spectrum (500 MHz, CD<sub>3</sub>OD, 323 K) of **1L** (2.0 mM) with **2S** (1.5 equiv.) showing no significant through space coupling between the gelator and the diamine.

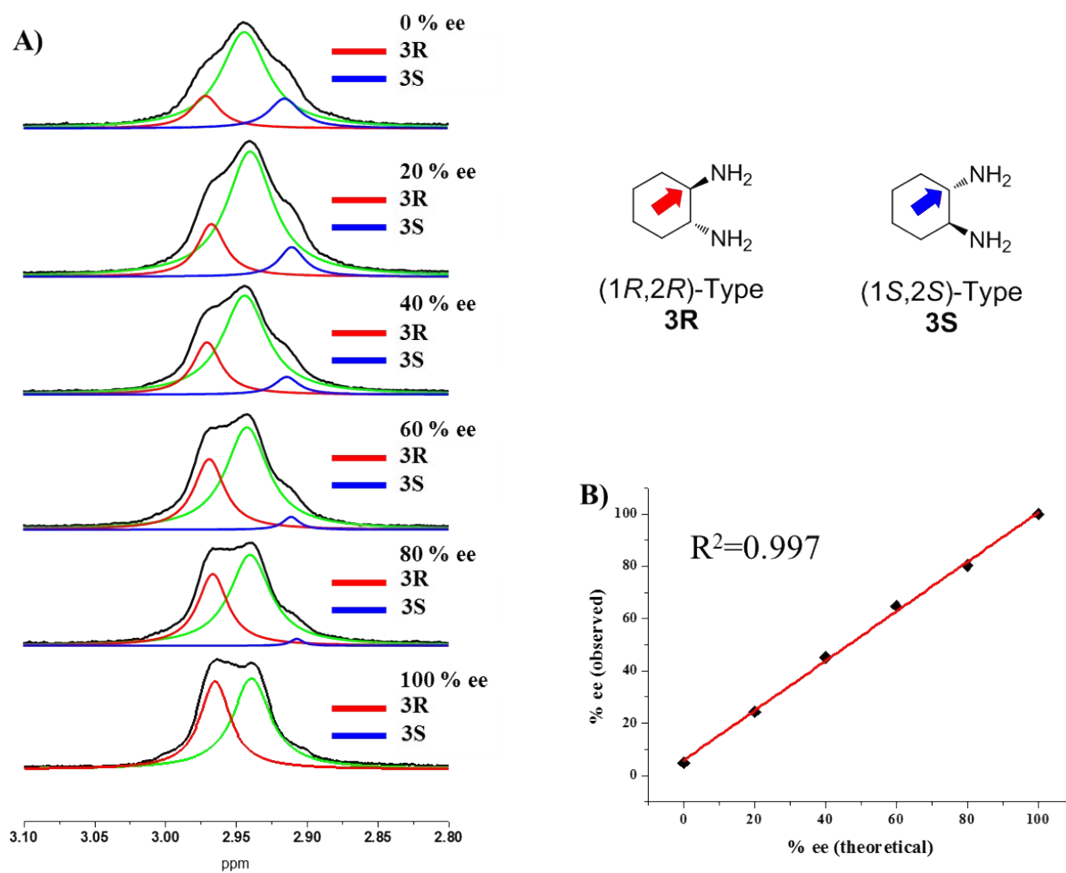

**Fig. S13** (A) A selected region of 300 MHz  $^1\text{H}$  NMR of gelator **1L** (20 mM) with various enantiomeric excess (% ee) in the presence of various mixtures of **3R** and **3S** (30 mM) in  $\text{D}_2\text{O}/\text{DMSO-}d_6$  (5/1 v/v%); green curves present mixture of proton of **3R** and **3S** amines. (B) Correlation between the theoretical and observed % ee values.

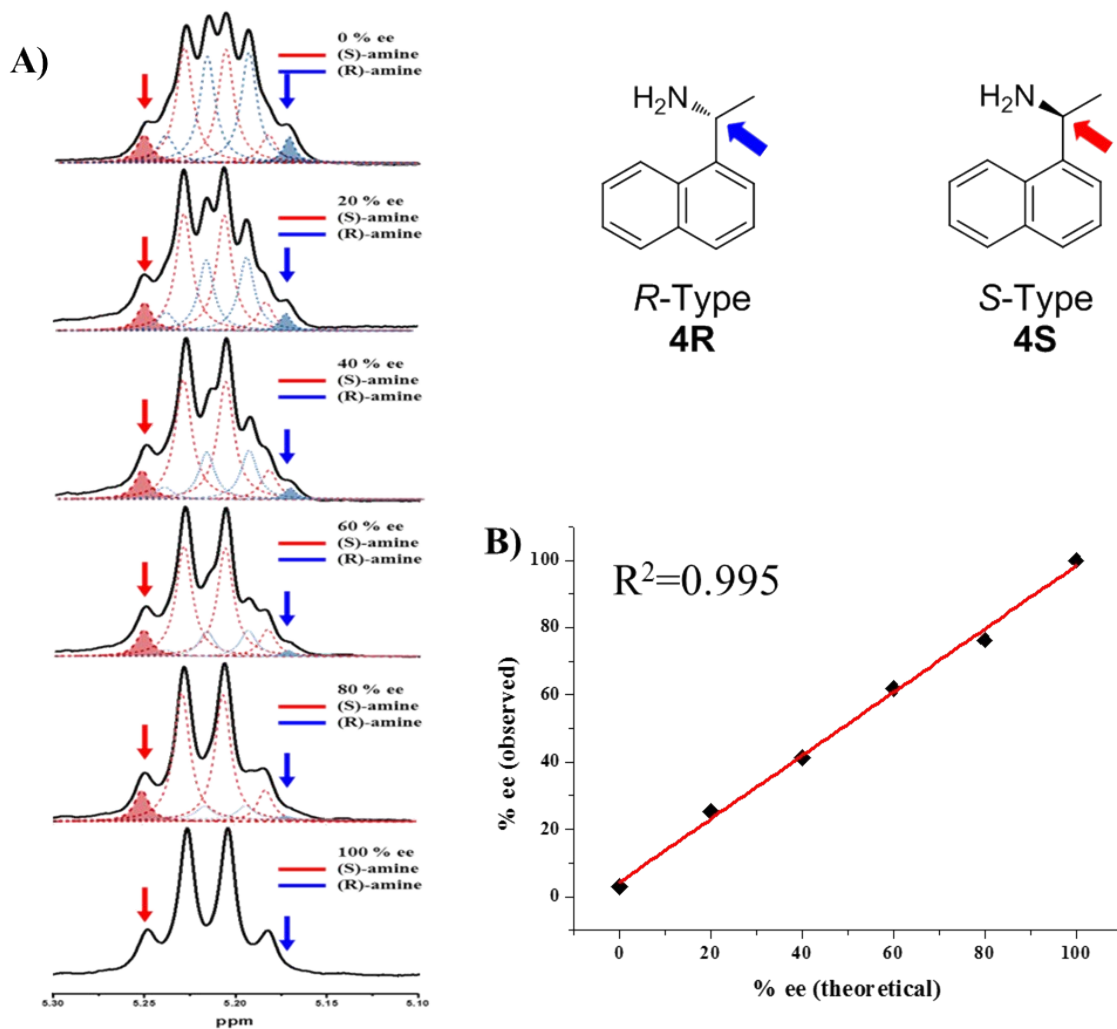

**Fig. S14** (A) A selected region of 300 MHz  $^1\text{H}$  NMR of gelator **1L** (20 mM) with various enantiomeric excess (% ee) in the presence of various mixtures of **4S** and **4R** (30 mM) in  $\text{D}_2\text{O}/\text{DMSO-}d_6$  (5/1 v/v%). (B) Correlation between the theoretical and observed % ee values.

1\_131026104500 #1 RT: 0.00 AV: 1 NL: 9.61E3  
T: ITMS -p ESI Full ms [150.00-2000.00]

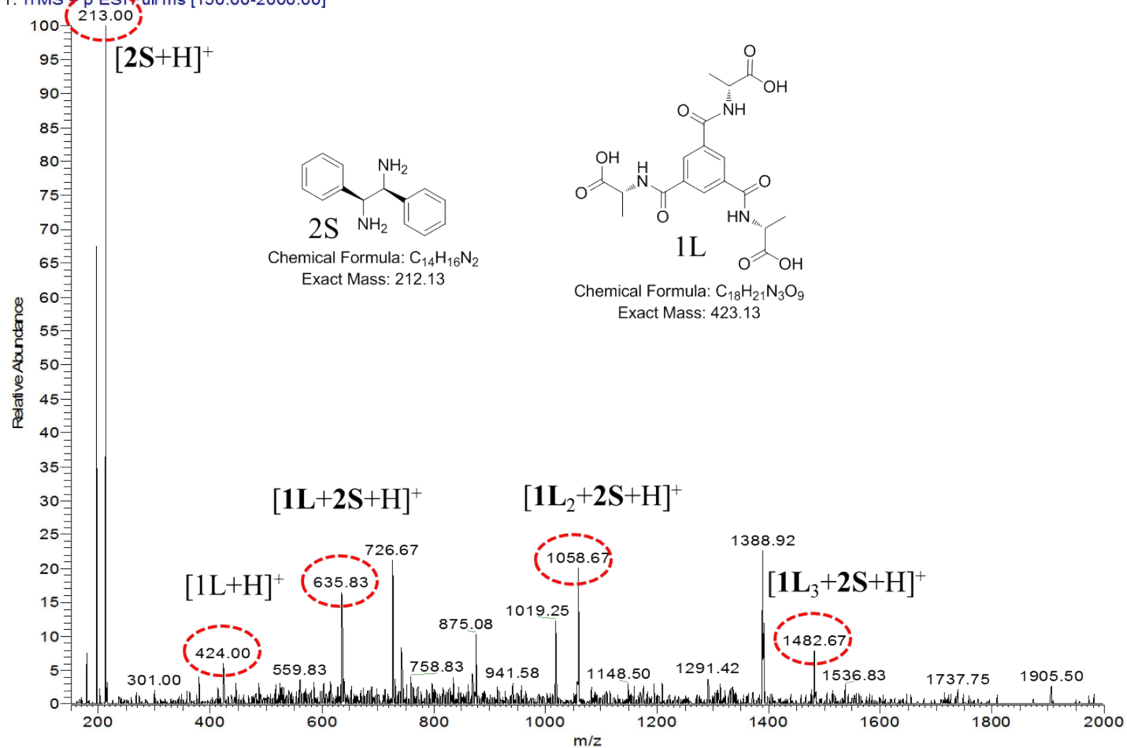

**Fig. S15** ESI-mass spectrum of obtained precipitation from mixtures of **1L** with **2S**.



A)

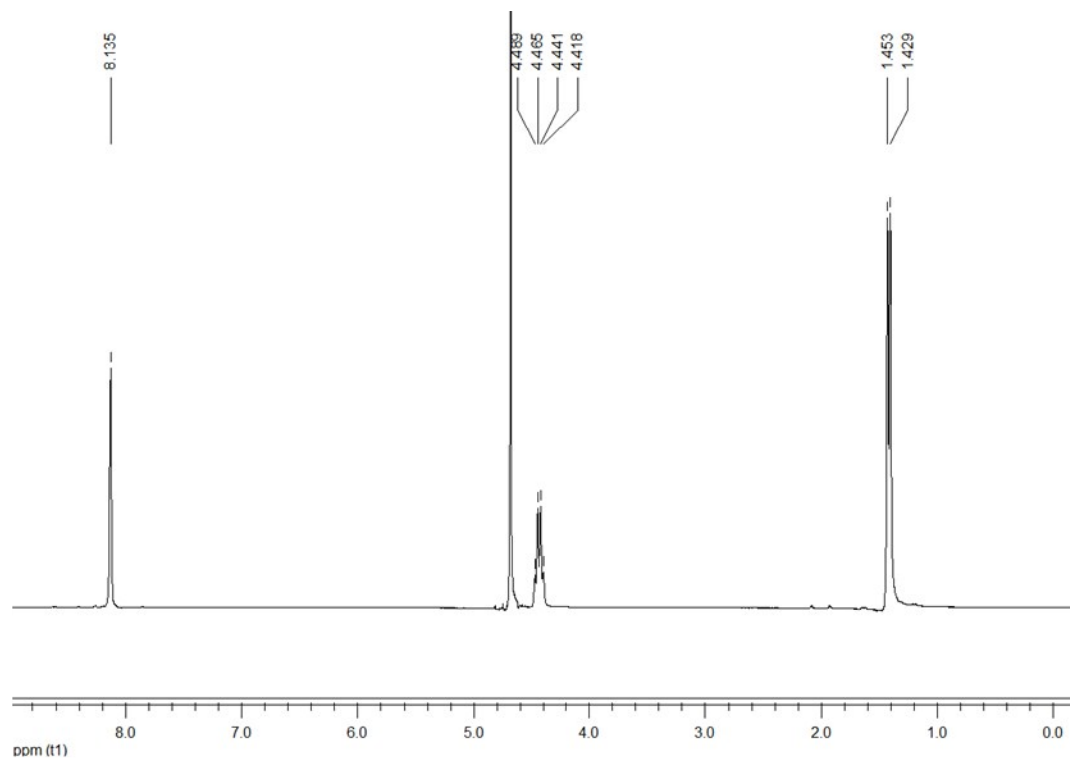

B)

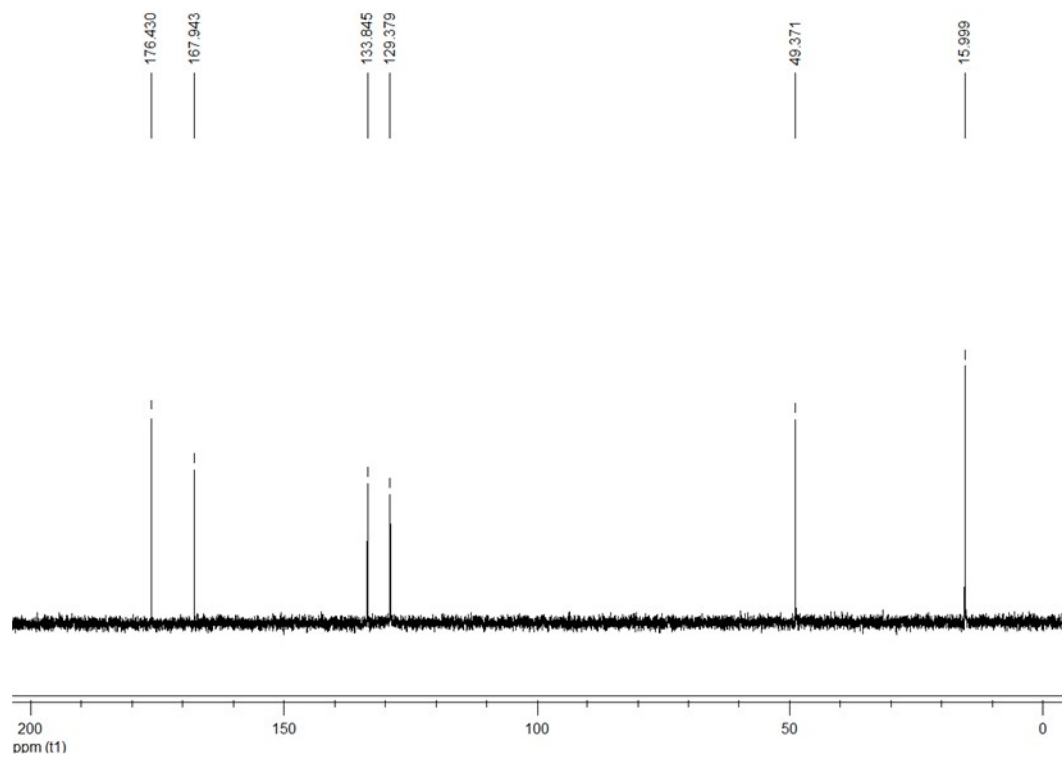

**Fig. S16** (a) <sup>1</sup>H NMR spectrum of **1D** (300 MHz, D<sub>2</sub>O). (b) <sup>13</sup>C NMR spectrum of **1D** (75 MHz, D<sub>2</sub>O).

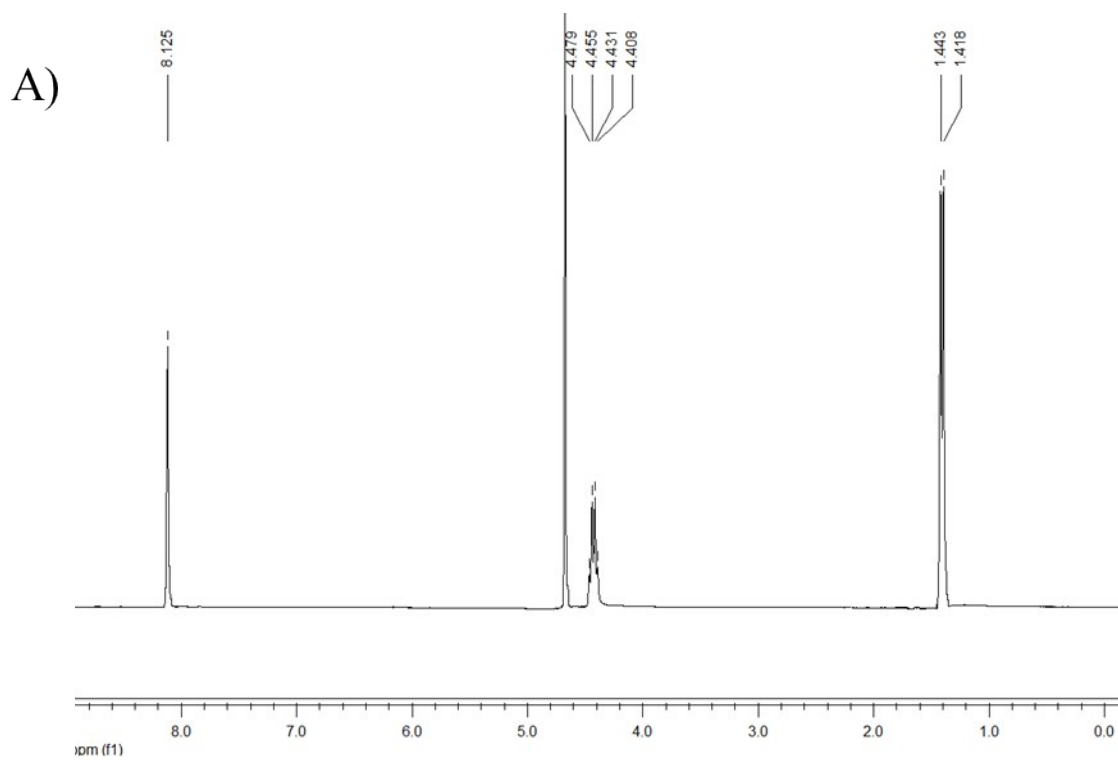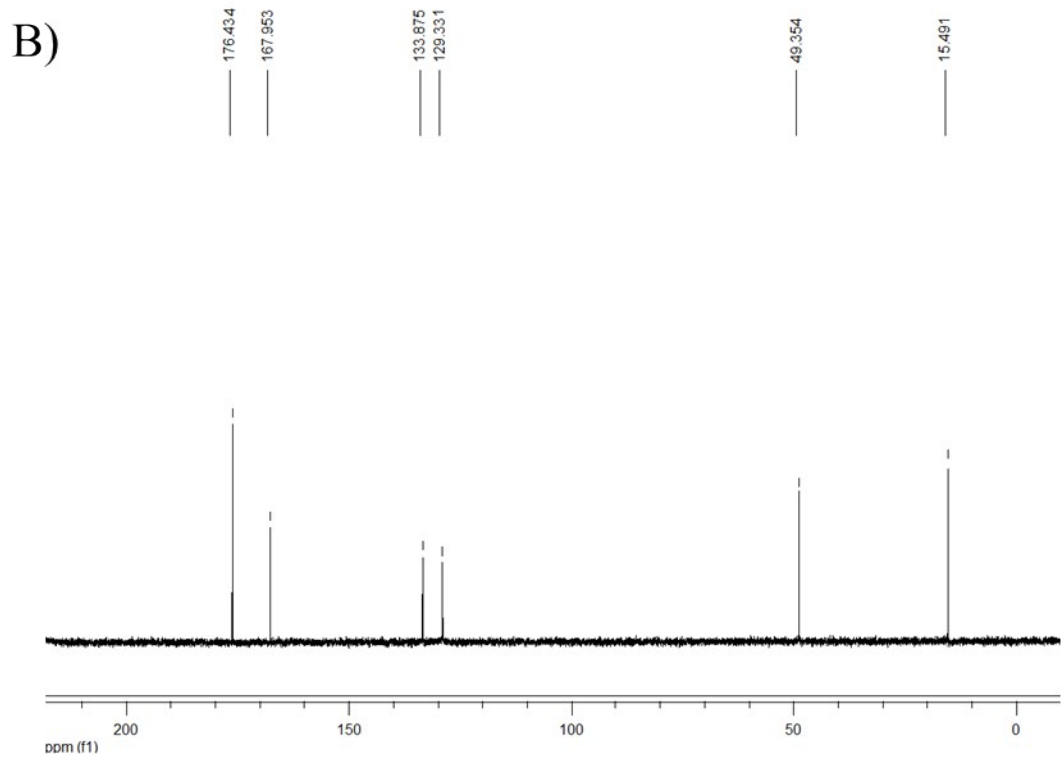

**Fig. S17** (a)  $^1\text{H}$  NMR spectrum of **1L** (300 MHz,  $\text{D}_2\text{O}$ ). (b)  $^{13}\text{C}$  NMR spectrum of **1L** (75 MHz,  $\text{D}_2\text{O}$ ).
